# Supplementary material for: TMEM119 (c.G143A, p.S48L) Mutation Is Involved in Primary Failure of Eruption by Attenuating Glycolysis-Mediated Osteogenesis
Source: MDPI journal article supplement (doi:10.3390/ijms25052821), 2024-02-29
Supplement: s1 [file s1]

## SUPPLEMENTARY MATERIAL

### Mutation Screening

The common genetic mutation of two patients from the family were detected by whole-exome sequencing (WES) conducted by Tsingke Biotechnology Co., Ltd. (Beijing, China), which refers to a genome analysis method that uses sequence capture technology to concentrate DNA in all exon regions of the genome for high-throughput sequencing analysis. Quality control, alignment analysis, and the calling analysis of WES data was shown in Supplementary Table S3 and Supplementary Table S4. The possible mutation must be variants with a minor allele frequency (MAF) <1% as reported in available databases (1000 genomes and gnomAD) and alter the original amino acid sequence such as missense mutation, deletion or insertion. At the same time, the mutation should be shared by both patients but not by the healthy controls. Based on these conditions, we obtained 4 SNPs, including transmembrane protein 119 (TMEM119), family with sequence similarity 83 member G (FAM83G), desmoplakin (DSP), sperm associated antigen 17 (SPAG17), and 2 Indel mutant genes, including proprotein convertase subtilisin/kexin type 4 (PCSK4), transmembrane protein 39A (TMEM39A). Subsequently, according to gene function, we screened out three candidate genes, including TMEM119, PCSK4 and FAM83G, may related to osteogenesis, osteoclast, calcium and phosphorus metabolism and tooth development. To verify the accuracy of whole-exon sequencing results, we utilized Sanger sequencing. 600 bp DNA sequence around mutant site was amplified in both patients and healthy controls with polymerase chain reaction (PCR). The primer sequences were as follows: TMEM119, forward, 5'-ATCACGTACTGGCGGAAGAA-3', and reverse, 5'- GAGTTCCGCCATGACTTCTCT-3' (product size 431bp); PCSK4, forward, 5'- CTACACGCTGCTGCTCTATG-3', and reverse, 5'-AGCCTTGTGTGGTTGAAGAA-3' (product size 334bp); FAM83G, forward, 5'- GAGCAGGCAGGTACTCGAAG-3', and reverse, 5'- AGCTGGGACTGCAACTAGAAC-3' (product size 456bp). PCR products were evaluated by agarose gel electrophoresis shown as Supplementary Figure S3 and sequenced in both forward and reverse directions by Tsingke Biotechnology Co. Ltd. (Beijing, China). Finally, the priority of candidate genes was sequenced using ToppGene

(<https://toppgene.cchmc.org/prioritization.jsp>). Training genes, test genes and test results were shown in Supplementary Table S5 and Supplementary Table S6. Based on the above analysis, TMEM119 was selected as the candidate disease gene for the family.

### **Pathogenic analysis**

We used the T-COFFEE Multiple Sequence Alignment Server (<https://tcoffee.crg.eu/>) to align the orthologous sequences of TMEM119 downloaded from UniProt (<http://www.uniprot.org>): Homo sapiens, Mus musculus, Rattus norvegicus, Gorilla, Pan troglodytes, and Oryctolagus cuniculus. The PSIPRED online server (<http://biinf.cs.ucl.ac.uk/psipred>) and SWISS-MODEL online server (<https://swissmodel.expasy.org>) were applied to construct the secondary and 3D structures of the wild-type and Ser48Leu mutant TMEM119. Predicted structures referred to the structure displayed in PyMol software 2.5 (Schrodinger, New York, NY, USA). The potential impact on the structure and function of the corresponding protein was predicted by SIFT (<http://sift.bii.a-star.edu.sg/>), Polyphen (PolyPhen-2, <http://genetics.bwh.harvard.edu/pph2/>), Mutation Assessor (<http://mutationassessor.org/>) and Mutation Taster (<http://www.mutationtaster.org/>) as shown in Supplementary Table S1.

**Supplementary Table S1** The results of variation prediction software

| Prediction software | Prediction score | Reference score              |
|---------------------|------------------|------------------------------|
| SIFT                | 0.02             | Damaging                     |
| PolyPhen-2          | 0.975            | Probably damaging            |
| Mutation Assessor   | 2.075            | Moderately affected function |
| Mutation Taster     | 0.988            | Damaging                     |

**Supplementary Table S2** All mutations located in PTH, PTH1R and PTHrP genes in the family

| Start    | End      | Ref | Alt | Func.refGene | Gene.refGene |            | 1000g2015aug<br>_all | 1000g2015aug<br>_eas | Exoni-<br>cFunc.refGene | Control1                             | Control2                             | II-1                                  | III-1                               |
|----------|----------|-----|-----|--------------|--------------|------------|----------------------|----------------------|-------------------------|--------------------------------------|--------------------------------------|---------------------------------------|-------------------------------------|
| 46907435 | 46907435 | A   | G   | intergenic   | MYL3,PTH1R   | rs3762795  | 0.469848             | 0.381                |                         | 0/1:2,2:4:3<br>7:37,0,37             | 1/1:0,1:1:3:4<br>3,3,0               | 1/1:0,1:1:3<br>:43,3,0                | /                                   |
| 46933266 | 46933266 | G   | T   | intronic     | PTH1R        | rs1466275  | 0.449681             | 0.4365               |                         | 1/1:0,4:4:1<br>2:111,12,0            | 1/1:0,1:1:3:4<br>1,3,0               | 1/1:0,1:1:3<br>:41,3,0                | /                                   |
| 46934292 | 46934292 | C   | A   | intronic     | PTH1R        | rs4683300  | 0.458466             | 0.4395               |                         | 0/1:5,1:6:2<br>3:23,0,138            | 0/1:1,7:8:12:<br>251,0,12            | 0/1:0,1:1:3<br>3:86:86,0,<br>312      | 1/1:0,1:1:3<br>:42,3,0              |
| 46935681 | 46935681 | C   | T   | intronic     | PTH1R        | rs724449   | 0.458067             | 0.4395               |                         | 0/1:4,3:7:9<br>6:96,0,126            | 0/1:4,1:5:25:<br>25,0,133            | 0/1:2,2:4:5<br>0:50,0,65              | 1/1:0,5:5:1<br>5:162,15,0           |
| 46941116 | 46941116 | A   | G   | intronic     | PTH1R        | rs2242116  | 0.502796             | 0.4425               |                         | 1/1:0,2:2:6<br>:72,6,0               | 0/1:3,2:5:67:<br>67,0,103            | 0/0:2,0:2:6<br>:0,6,49                | 1/1:0,1:1:3<br>:43,3,0              |
| 46941626 | 46941626 | T   | C   | intronic     | PTH1R        | rs10049237 | 0.789936             | 0.6091               |                         | /                                    | 1/1:0,2:2:6:7<br>6,6,0               | /                                     | /                                   |
| 46944274 | 46944274 | T   | C   | exonic       | PTH1R        | rs1138518  | 0.643371             | 0.4425               | synonymous<br>SNV       | 0/1:67,62:<br>129:99:17<br>44,0,1954 | 0/1:87,67:15<br>4:99:1844,0,<br>2317 | 0/1:100,74<br>:174:99:20<br>32,0,2672 | 1/1:0,169:<br>169:99:53<br>85,507,0 |
| 46948526 | 46948526 | T   | C   | intergenic   | PTH1R,CCDC12 | rs7652849  | 0.966054             | 0.998                |                         | /                                    | 1/1:0,7:7:21:<br>234,21,0            | 1/1:0,6:6:1<br>8:148,18,0             | 1/1:0,1:1:3<br>:43,3,0              |
| 46951935 | 46951935 | T   | C   | intergenic   | PTH1R,CCDC12 | rs11719795 | 0.664337             | 0.4385               |                         | /                                    | /                                    | 1/1:0,2:2:6<br>:49,6,0                | 1/1:0,1:1:3<br>:41,3,0              |

|          |          |      |   |            |              |             |          |        |                                 |                               |                                   |                                 |
|----------|----------|------|---|------------|--------------|-------------|----------|--------|---------------------------------|-------------------------------|-----------------------------------|---------------------------------|
| 46957298 | 46957298 | G    | A | intergenic | PTH1R,CCDC12 | rs9855938   | 0.563299 | 0.4375 | /                               | /                             | /                                 | 1/1:0,3:3:9<br>:87,9,0          |
| 46937683 | 46937686 | AGAC | - | intronic   | PTH1R        | rs138467732 | 0.458067 | 0.4385 | 0/0:3,0:3:9<br>:0,9,182         | /                             | 0/1:1,2:3:5<br>2:81,0,52          | 1/1:0,4:4:1<br>2:180,12,0       |
| 46945263 | 46945263 | -    | A | UTR3       | PTH1R        | rs142021243 | 0.153155 | 0.1825 | 0/0:19,1:2<br>0:32:0,32,<br>406 | 0/1:12,12:24:<br>99:246,0,214 | 0/1:19,20:<br>39:99:413,<br>0,368 | 0/1:9,8:17:<br>99:151,0,1<br>59 |
| 46949036 | 46949039 | TGTA | - | intergenic | PTH1R,CCDC12 | rs10579601  | 0.454273 | 0.4385 | 1/1:0,2:2:6<br>:90,6,0          | 0/0:1,0:1:3:0,<br>3,45        | /                                 | /                               |
| 46949123 | 46949126 | TGTG | - | intergenic | PTH1R,CCDC12 | rs10587792  | 0.621406 | 0.4663 | 1/1:0,3:3:9<br>:135,9,0         | /                             | /                                 | /                               |
| 46955971 | 46955971 | A    | - | intergenic | PTH1R,CCDC12 | rs397989442 | 0.652955 | 0.4385 | 1/1:0,4:4:1<br>2:99,12,0        | 0/0:1,0:1:3:0,<br>3,27        | /                                 | 1/1:0,2:2:6<br>:51,6,0          |
| 13492898 | 13492898 | A    | G | intergenic | BTBD10,PTH   | rs307234    | 0.915535 | 0.999  | 1/1:0,2:2:6<br>:84,6,0          | /                             | /                                 | /                               |
| 13492952 | 13492952 | A    | G | intergenic | BTBD10,PTH   | rs307235    | 0.986621 | 1      | 1/1:0,3:3:9<br>:90,9,0          | /                             | /                                 | /                               |
| 13493272 | 13493272 | T    | C | intergenic | BTBD10,PTH   | rs307236    | 0.296526 | 0.5208 | 1/1:0,3:3:9<br>:89,9,0          | /                             | /                                 | 0/0:1,0:1:3<br>:0,3,10          |
| 13497153 | 13497153 | C    | T | intergenic | BTBD10,PTH   | rs12365769  | 0.151558 | 0.1706 | /                               | /                             | 1/1:0,2:2:6<br>:79,6,0            | 0/0:2,0:2:6<br>:0,6,49          |
| 13497179 | 13497179 | T    | C | intergenic | BTBD10,PTH   | rs12361526  | 0.151558 | 0.1706 | /                               | /                             | 1/1:0,2:2:6<br>:82,6,0            | 0/0:2,0:2:6<br>:0,6,49          |
| 13500276 | 13500276 | T    | C | intergenic | BTBD10,PTH   | rs307215    | 0.914337 | 0.999  | /                               | 1/1:0,2:2:6:8<br>4,6,0        | /                                 | /                               |

|          |          |   |   |            |            |           |          |        |                   |                                   |                               |                                     |                                   |
|----------|----------|---|---|------------|------------|-----------|----------|--------|-------------------|-----------------------------------|-------------------------------|-------------------------------------|-----------------------------------|
| 13501825 | 13501825 | A | G | intergenic | BTBD10,PTH | rs307214  | 0.986222 | 1      |                   | 1/1:0,7:7:2<br>1:211,21,0         | 1/1:0,2:2:6:7<br>5,6,0        | 1/1:0,2:2:6<br>:49,6,0              | /                                 |
| 13502412 | 13502412 | A | C | intergenic | BTBD10,PTH | rs307213  | 0.914337 | 0.999  |                   | /                                 | 1/1:0,2:2:6:8<br>4,6,0        | /                                   | /                                 |
| 13508240 | 13508240 | G | C | intergenic | BTBD10,PTH | rs2004314 | 0.456869 | 0.3085 |                   | 0/0:1,0:1:3<br>:0,3,42            | 0/0:6,0:6:18:<br>0,18,133     | 0/0:2,0:2:6<br>:0,6,49              | 0/1:4,5:9:9<br>0:115,0,90         |
| 13508320 | 13508320 | T | C | intergenic | BTBD10,PTH | rs307255  | 0.914137 | 0.999  |                   | /                                 | 1/1:0,4:4:12:<br>112,12,0     | 1/1:0,6:6:1<br>8:184,18,0           | 1/1:0,7:7:2<br>1:226,21,0         |
| 13510474 | 13510474 | G | A | intergenic | BTBD10,PTH | rs307252  | 0.507188 | 0.6935 |                   | /                                 | 1/1:0,2:2:6:7<br>8,6,0        | /                                   | 0/0:1,0:1:3<br>:0,3,38            |
| 13511359 | 13511359 | G | A | intergenic | BTBD10,PTH | rs307251  | 0.279553 | 0.5228 |                   | /                                 | 1/1:0,2:2:6:7<br>8,6,0        | /                                   | 0/0:1,0:1:3<br>:0,3,41            |
| 13514053 | 13514053 | G | T | exonic     | PTH        | rs6256    | 0.151358 | 0.121  | synonymous<br>SNV | 0/0:55,0:5<br>5:99:0,164<br>,1821 | 0/0:77,0:77:9<br>9:0,231,2557 | 0/0:104,0:<br>104:99:0,3<br>12,3409 | 0/1:32,34:<br>66:99:926,<br>0,779 |
| 13514417 | 13514417 | C | T | intronic   | PTH        | rs694     | 0.417732 | 0.3065 |                   | 0/1:6,6:12:<br>99:190,0,1<br>75   | 0/0:15,0:15:4<br>5:0,45,612   | 0/1:8,7:15:<br>99:183,0,2<br>58     | 0/1:4,6:10:<br>99:199,0,1<br>35   |
| 13514505 | 13514505 | C | T | intronic   | PTH        | rs177706  | 0.497005 | 0.6935 |                   | 0/1:1,1:2:3<br>1:34,0,31          | 1/1:0,6:6:18:<br>223,18,0     | 0/1:1,3:4:2<br>6:107,0,26           | 0/0:2,0:2:6<br>:0,6,76            |
| 13521469 | 13521469 | C | T | intergenic | PTH,FAR1   | rs2121633 | 0.417732 | 0.3046 |                   | 1/1:0,1:1:3<br>:39,3,0            | /                             | 1/1:0,2:2:6<br>:49,6,0              | /                                 |
| 13522997 | 13522997 | G | A | intergenic | PTH,FAR1   | rs307209  | 0.986422 | 1      |                   | 1/1:0,1:1:3<br>:37,3,0            | /                             | 1/1:0,5:5:1<br>5:163,15,0           | /                                 |

|          |          |   |   |            |          |            |          |        |                         |                           |                           |                          |
|----------|----------|---|---|------------|----------|------------|----------|--------|-------------------------|---------------------------|---------------------------|--------------------------|
| 13539512 | 13539512 | T | C | intergenic | PTH,FAR1 | rs1459017  | 0.915335 | 0.999  | /                       | 1/1:0,2:2:6:9<br>0,6,0    | /                         | /                        |
| 13548662 | 13548662 | A | G | intergenic | PTH,FAR1 | rs11022868 | 0.43131  | 0.3046 | 1/1:0,3:3:9<br>:121,9,0 | 0/0:5,0:5:15:<br>0,15,135 | /                         | 0/1:1,1:2:3<br>5:35,0,35 |
| 13555520 | 13555520 | A | G | intergenic | PTH,FAR1 | rs1841151  | 0.993211 | 1      | 1/1:0,3:3:9<br>:124,9,0 | 1/1:0,4:4:12:<br>99,12,0  | 1/1:0,5:5:1<br>5:142,15,0 | 1/1:0,1:1:3<br>:43,3,0   |
| 13557255 | 13557255 | T | C | intergenic | PTH,FAR1 | rs1459014  | 0.153355 | 0.1706 | /                       | /                         | 0/1:1,1:2:1<br>9:19,0,19  | 1/1:0,3:3:9<br>:74,9,0   |
| 13558262 | 13558262 | C | T | intergenic | PTH,FAR1 | rs11022870 | 0.451877 | 0.6944 | /                       | /                         | /                         | 0/1:1,2:3:3<br>1:71,0,31 |
| 13568618 | 13568618 | A | C | intergenic | PTH,FAR1 | rs11022874 | 0.452077 | 0.6954 | /                       | 1/1:0,4:4:12:<br>99,12,0  | /                         | 0/1:1,1:2:3<br>2:32,0,36 |
| 13571050 | 13571050 | G | A | intergenic | PTH,FAR1 | rs4757165  | 0.57488  | 0.6954 | /                       | 1/1:0,2:2:6:7<br>8,6,0    | 1/1:0,2:2:6<br>:49,6,0    | /                        |
| 13571113 | 13571113 | A | G | intergenic | PTH,FAR1 | rs4757166  | 0.451677 | 0.6944 | /                       | 1/1:0,1:1:3:4<br>1,3,0    | 1/1:0,2:2:6<br>:49,6,0    | /                        |
| 13571211 | 13571211 | T | G | intergenic | PTH,FAR1 | rs4757167  | 0.451877 | 0.6944 | /                       | 1/1:0,4:4:12:<br>149,12,0 | 1/1:0,2:2:6<br>:49,6,0    | /                        |
| 13574774 | 13574774 | A | G | intergenic | PTH,FAR1 | rs4757170  | 0.154752 | 0.1696 | 0/0:1,0:1:3<br>:0,3,25  | 0/0:1,0:1:3:0,<br>3,38    | 0/1:1,2:3:1<br>:78,0,1    | 0/0:1,0:1:3<br>:0,3,32   |
| 13574915 | 13574915 | G | A | intergenic | PTH,FAR1 | rs4757171  | 0.574481 | 0.6954 | 1/1:0,1:1:3<br>:42,3,0  | 1/1:0,3:3:9:1<br>16,9,0   | 1/1:0,2:2:6<br>:81,6,0    | /                        |
| 13582329 | 13582329 | G | A | intergenic | PTH,FAR1 | rs2085652  | 0.452077 | 0.6944 | /                       | 1/1:0,2:2:6:4<br>9,6,0    | /                         | 0/1:1,4:5:2<br>3:84,0,23 |

|          |          |   |   |            |          |             |          |        |                           |                           |                           |                           |
|----------|----------|---|---|------------|----------|-------------|----------|--------|---------------------------|---------------------------|---------------------------|---------------------------|
| 13582441 | 13582441 | A | G | intergenic | PTH,FAR1 | rs7107041   | 0.915136 | 0.999  | /                         | 1/1:0,1:1:3:4<br>2,3,0    | /                         | 1/1:0,2:2:6<br>:87,6,0    |
| 13588150 | 13588150 | C | A | intergenic | PTH,FAR1 | rs4757179   | 0.986022 | 0.999  | 1/1:0,1:1:3<br>:40,3,0    | 1/1:0,2:2:6:4<br>9,6,0    | 1/1:0,2:2:6<br>:49,6,0    | /                         |
| 13601682 | 13601682 | C | T | intergenic | PTH,FAR1 | rs4757184   | 0.452077 | 0.6944 | 1/1:0,2:2:6<br>:49,6,0    | /                         | /                         | 1/1:0,1:1:3<br>:40,3,0    |
| 13605157 | 13605157 | C | A | intergenic | PTH,FAR1 | rs183597485 | 0.003794 | 0.0188 | 0/1:2,3:5:3<br>4:65,0,34  | 0/0:3,0:3:9:0,<br>9,120   | 1/1:0,4:4:1<br>2:129,12,0 | /                         |
| 13605232 | 13605232 | C | A | intergenic | PTH,FAR1 | rs11493157  | 0.452476 | 0.6944 | 0/1:2,2:4:6<br>5:65,0,70  | 1/1:0,6:6:18:<br>190,18,0 | 0/0:5,0:5:1<br>5:0,15,142 | /                         |
| 13612518 | 13612518 | C | T | intergenic | PTH,FAR1 | rs7129881   | 0.452676 | 0.6944 | 0/1:4,1:5:2<br>5:25,0,147 | 1/1:0,4:4:12:<br>150,12,0 | /                         | 0/1:5,2:7:2<br>8:28,0,120 |
| 13612552 | 13612552 | A | G | intergenic | PTH,FAR1 | rs7115286   | 0.872404 | 0.999  | 1/1:0,6:6:1<br>8:176,18,0 | 1/1:0,5:5:15:<br>159,15,0 | /                         | 1/1:0,8:8:2<br>4:198,24,0 |
| 13612585 | 13612585 | C | A | intergenic | PTH,FAR1 | rs7129905   | 0.444888 | 0.6944 | 0/0:4,0:4:1<br>2:0,12,128 | 1/1:0,4:4:12:<br>150,12,0 | /                         | 0/1:3,1:4:2<br>6:26,0,62  |
| 13613489 | 13613489 | A | G | intergenic | PTH,FAR1 | rs7941196   | 0.452276 | 0.6944 | 0/0:1,0:1:3<br>:0,3,31    | 1/1:0,2:2:6:8<br>3,6,0    | 1/1:0,1:1:3<br>:44,3,0    | /                         |
| 13617366 | 13617366 | G | T | intergenic | PTH,FAR1 | rs10766102  | 0.531949 | 0.5595 | 1/1:0,1:1:3<br>:38,3,0    | /                         | 0/0:1,0:1:3<br>:0,3,43    | 1/1:0,2:2:6<br>:49,6,0    |
| 13619440 | 13619440 | G | C | intergenic | PTH,FAR1 | rs28613793  | 0.979433 | 1      | 1/1:0,2:2:6<br>:49,6,0    | 1/1:0,1:1:3:3<br>9,3,0    | 1/1:0,1:1:3<br>:43,3,0    | /                         |
| 13620172 | 13620172 | T | C | intergenic | PTH,FAR1 | rs9630182   | 0.539137 | 0.5645 | 0/1:1,5:6:2<br>0:118,0,20 | 0/0:1,0:1:3:0,<br>3,39    | /                         | 1/1:0,1:1:3<br>:43,3,0    |

|          |          |     |   |            |              |             |          |        |                        |                         |                          |                           |
|----------|----------|-----|---|------------|--------------|-------------|----------|--------|------------------------|-------------------------|--------------------------|---------------------------|
| 13620302 | 13620302 | A   | G | intergenic | PTH,FAR1     | rs1502239   | 0.539137 | 0.5645 | 1/1:0,2:2:6<br>:82,6,0 | 0/0:1,0:1:3:0,<br>3,41  | /                        | /                         |
| 13623179 | 13623179 | C   | T | intergenic | PTH,FAR1     | rs10832079  | 0.277955 | 0.2609 | 1/1:0,3:3:9<br>:88,9,0 | 0/0:1,0:1:3:0,<br>3,39  | /                        | 0/0:1,0:1:3<br>:0,3,41    |
| 13624421 | 13624421 | C   | G | intergenic | PTH,FAR1     | rs10832080  | 0.209665 | 0.2599 | 1/1:0,3:3:9<br>:90,9,0 | /                       | /                        | /                         |
| 13679433 | 13679433 | T   | C | intergenic | PTH,FAR1     | rs2699445   | 0.977636 | 1      | /                      | 1/1:0,3:3:9:9<br>7,9,0  | 1/1:0,1:1:3<br>:38,3,0   | /                         |
| 13493204 | 13493204 | -   | A | intergenic | BTBD10,PTH   | rs397731498 | 0.436502 | 0.2946 | 1/1:0,2:2:6<br>:50,6,0 | /                       | /                        | 1/1:0,1:1:3<br>:25,3,0    |
| 13502272 | 13502272 | C   | - | intergenic | BTBD10,PTH   | /           | .        | .      | /                      | 0/0:2,0:2:6:0,<br>6,74  | /                        | 1/1:0,2:2:6<br>:75,6,0    |
| 13558331 | 13558333 | CTC | - | intergenic | PTH,FAR1     | rs35940563  | 0.451877 | 0.6944 | /                      | /                       | 0/0:3,0:3:9<br>:0,9,135  | 0/1:2,3:5:8<br>5:120,0,85 |
| 13565023 | 13565023 | T   | - | intergenic | PTH,FAR1     | /           | .        | .      | 1/1:0,3:3:9<br>:70,9,0 | /                       | 0/0:1,0:1:3<br>:0,3,10   | /                         |
| 13589642 | 13589642 | -   | G | intergenic | PTH,FAR1     | rs397848567 | 0.453674 | 0.6944 | 0/0:2,0:2:6<br>:0,6,74 | 1/1:0,3:3:9:1<br>11,9,0 | 1/1:0,1:1:3<br>:37,3,0   | 0/0:2,0:2:6<br>:0,6,74    |
| 13650878 | 13650878 | T   | - | intergenic | PTH,FAR1     | rs34458047  | 0.746605 | 0.9435 | 0/0:2,0:2:6<br>:0,6,55 | 1/1:0,2:2:6:5<br>0,6,0  | 1/1:0,1:1:3<br>:24,3,0   | /                         |
| 13683389 | 13683390 | TT  | - | intergenic | PTH,FAR1     | /           | /        | /      | 1/1:0,2:2:6<br>:63,6,0 | 0/0:1,0:1:3:0,<br>3,20  | 0/1:1,2:3:2<br>5:55,0,25 | /                         |
| 27961587 | 27961587 | T   | C | intergenic | KLHL42,PTHRP | rs7312945   | 0.792931 | 0.7004 | 1/1:0,1:1:3<br>:45,3,0 | 1/1:0,2:2:6:9<br>0,6,0  | 0/0:1,0:1:3<br>:0,3,65   | /                         |

|          |          |   |   |            |              |            |          |        |                           |                          |                         |                           |
|----------|----------|---|---|------------|--------------|------------|----------|--------|---------------------------|--------------------------|-------------------------|---------------------------|
| 27961597 | 27961597 | T | A | intergenic | KLHL42,PTHRP | rs7312948  | 0.792931 | 0.7004 | 1/1:0,1:1:3<br>:45,3,0    | 1/1:0,2:2:6:9<br>0,6,0   | 0/0:1,0:1:3<br>:0,3,65  | /                         |
| 27961793 | 27961793 | T | G | intergenic | KLHL42,PTHRP | rs4931495  | 0.992612 | 1      | 1/1:0,2:2:6<br>:86,6,0    | 1/1:0,2:2:6:9<br>0,6,0   | 1/1:0,3:3:9<br>:115,9,0 | /                         |
| 27961803 | 27961803 | C | T | intergenic | KLHL42,PTHRP | rs4931496  | 0.791334 | 0.6994 | 0/1:1,1:2:3<br>1:34,0,31  | 1/1:0,2:2:6:7<br>9,6,0   | 0/0:3,0:3:9<br>:0,9,123 | /                         |
| 27963358 | 27963358 | A | G | intergenic | KLHL42,PTHRP | rs4931500  | 0.895168 | 0.9325 | 1/1:0,4:4:1<br>2:161,12,0 | 1/1:0,2:2:6:8<br>4,6,0   | 1/1:0,1:1:3<br>:44,3,0  | 1/1:0,5:5:1<br>5:174,15,0 |
| 27963402 | 27963402 | G | A | intergenic | KLHL42,PTHRP | rs3751236  | 0.173922 | 0.3462 | 0/0:3,0:3:9<br>:0,9,125   | 0/0:3,0:3:9:0,<br>9,120  | 0/0:1,0:1:3<br>:0,3,41  | 0/1:1,4:5:2<br>6:69,0,26  |
| 27963546 | 27963546 | G | A | intergenic | KLHL42,PTHRP | rs2347223  | 0.509185 | 0.6458 | 0/0:4,0:4:1<br>2:0,12,164 | 1/1:0,2:2:6:7<br>7,6,0   | /                       | /                         |
| 27966210 | 27966210 | C | G | intergenic | KLHL42,PTHRP | rs11610005 | 0.418331 | 0.4028 | 0/1:2,1:3:3<br>2:32,0,65  | 0/1:2,3:5:68:<br>74,0,68 | 1/1:0,1:1:3<br>:32,3,0  | 1/1:0,1:1:3<br>:43,3,0    |
| 27969214 | 27969214 | G | A | intergenic | KLHL42,PTHRP | rs11833076 | 0.727037 | 0.7738 | 1/1:0,4:4:1<br>2:136,12,0 | 1/1:0,2:2:6:4<br>9,6,0   | /                       | /                         |
| 27969591 | 27969591 | G | C | intergenic | KLHL42,PTHRP | rs61915453 | 0.564097 | 0.5952 | /                         | 1/1:0,1:1:3:3<br>7,3,0   | 1/1:0,3:3:9<br>:87,9,0  | 0/0:1,0:1:3<br>:0,3,10    |
| 27983738 | 27983738 | T | C | intergenic | KLHL42,PTHRP | rs2347229  | 0.833866 | 0.8323 | 1/1:0,3:3:9<br>:59,9,0    | 1/1:0,1:1:3:4<br>1,3,0   | /                       | /                         |
| 27983816 | 27983816 | C | A | intergenic | KLHL42,PTHRP | rs2347230  | 0.833866 | 0.8323 | 1/1:0,2:2:6<br>:80,6,0    | 1/1:0,1:1:3:3<br>8,3,0   | /                       | /                         |
| 27985517 | 27985517 | T | C | intergenic | KLHL42,PTHRP | rs5022769  | 0.6873   | 0.8185 | 1/1:0,2:2:6<br>:82,6,0    | /                        | 0/0:2,0:2:6<br>:0,6,49  | 0/0:1,0:1:3<br>:0,3,43    |

|          |          |   |   |            |              |            |          |        |                           |                           |                           |                        |
|----------|----------|---|---|------------|--------------|------------|----------|--------|---------------------------|---------------------------|---------------------------|------------------------|
| 27986072 | 27986072 | C | T | intergenic | KLHL42,PTHRP | rs7297278  | 0.958267 | 1      | 1/1:0,4:4:1<br>2:127,12,0 | 1/1:0,5:5:15:<br>143,15,0 | 1/1:0,1:1:3<br>:33,3,0    | /                      |
| 27986108 | 27986108 | A | T | intergenic | KLHL42,PTHRP | rs7297182  | 0.958466 | 1      | 1/1:0,5:5:1<br>5:225,15,0 | 1/1:0,4:4:12:<br>180,12,0 | 1/1:0,1:1:3<br>:45,3,0    | 1/1:0,2:2:6<br>:90,6,0 |
| 27986113 | 27986113 | A | G | intergenic | KLHL42,PTHRP | rs7297183  | 0.958466 | 1      | 1/1:0,5:5:1<br>5:225,15,0 | 1/1:0,4:4:12:<br>180,12,0 | 1/1:0,1:1:3<br>:45,3,0    | 1/1:0,2:2:6<br>:90,6,0 |
| 27989399 | 27989399 | C | T | intergenic | KLHL42,PTHRP | rs7310597  | 0.957668 | 1      | 1/1:0,1:1:3<br>:39,3,0    | 1/1:0,4:4:12:<br>129,12,0 | 1/1:0,1:1:3<br>:40,3,0    | 1/1:0,1:1:3<br>:34,3,0 |
| 27990590 | 27990590 | C | T | intergenic | KLHL42,PTHRP | rs7315196  | 0.957668 | 1      | /                         | /                         | 1/1:0,2:2:6<br>:80,6,0    | 1/1:0,3:3:9<br>:89,9,0 |
| 27990653 | 27990653 | T | C | intergenic | KLHL42,PTHRP | rs7300940  | 0.957668 | 1      | /                         | 1/1:0,3:3:9:1<br>35,9,0   | 1/1:0,2:2:6<br>:90,6,0    | 1/1:0,1:1:3<br>:45,3,0 |
| 27990665 | 27990665 | G | A | intergenic | KLHL42,PTHRP | rs7315513  | 0.957668 | 1      | /                         | 1/1:0,3:3:9:1<br>35,9,0   | 1/1:0,2:2:6<br>:90,6,0    | 1/1:0,1:1:3<br>:45,3,0 |
| 27990692 | 27990692 | G | A | intergenic | KLHL42,PTHRP | rs7315523  | 0.957668 | 1      | /                         | 1/1:0,3:3:9:8<br>9,9,0    | 1/1:0,4:4:1<br>2:139,12,0 | 1/1:0,1:1:3<br>:38,3,0 |
| 27990726 | 27990726 | T | C | intergenic | KLHL42,PTHRP | rs7301048  | 0.957268 | 1      | /                         | 1/1:0,4:4:12:<br>99,12,0  | 1/1:0,2:2:6<br>:78,6,0    | /                      |
| 28031526 | 28031526 | C | T | intergenic | KLHL42,PTHRP | rs12301526 | 0.209265 | 0.1776 | /                         | 0/1:1,2:3:33:<br>68,0,33  | /                         | /                      |
| 28034760 | 28034760 | A | G | intergenic | KLHL42,PTHRP | rs258431   | 0.669129 | 0.7034 | 1/1:0,3:3:9<br>:118,9,0   | /                         | /                         | /                      |
| 28049129 | 28049129 | G | A | intergenic | KLHL42,PTHRP | rs258447   | 0.758986 | 0.5903 | 1/1:0,1:1:3<br>:42,3,0    | 1/1:0,2:2:6:8<br>1,6,0    | /                         | /                      |

|          |          |   |   |            |              |            |          |        |                           |                           |                           |                            |
|----------|----------|---|---|------------|--------------|------------|----------|--------|---------------------------|---------------------------|---------------------------|----------------------------|
| 28049250 | 28049250 | G | A | intergenic | KLHL42,PTHRP | rs258448   | 0.520567 | 0.4087 | /                         | /                         | 1/1:0,2:2:6<br>:49,6,0    | 1/1:0,4:4:1<br>:2:129,12,0 |
| 28051265 | 28051265 | T | C | intergenic | KLHL42,PTHRP | rs258391   | 0.921725 | 0.8839 | /                         | 1/1:0,1:1:3:4<br>0,3,0    | 1/1:0,2:2:6<br>:49,6,0    | /                          |
| 28063293 | 28063293 | G | A | intergenic | KLHL42,PTHRP | rs12832168 | 0.90016  | 0.8839 | /                         | 1/1:0,2:2:6:7<br>7,6,0    | 1/1:0,1:1:3<br>:40,3,0    | 1/1:0,2:2:6<br>:49,6,0     |
| 28064019 | 28064019 | A | G | intergenic | KLHL42,PTHRP | rs11049220 | 0.235024 | 0.1954 | /                         | 1/1:0,1:1:3:3<br>7,3,0    | 1/1:0,2:2:6<br>:49,6,0    | 1/1:0,1:1:3<br>:42,3,0     |
| 28064107 | 28064107 | C | G | intergenic | KLHL42,PTHRP | rs11049221 | 0.406749 | 0.4742 | /                         | 1/1:0,5:5:15:<br>124,15,0 | 1/1:0,3:3:9<br>:93,9,0    | 1/1:0,2:2:6<br>:84,6,0     |
| 28064235 | 28064235 | T | C | intergenic | KLHL42,PTHRP | rs4931626  | 0.890775 | 0.8859 | 1/1:0,3:3:9<br>:90,9,0    | 1/1:0,5:5:15:<br>155,15,0 | 1/1:0,1:1:3<br>:38,3,0    | 1/1:0,3:3:9<br>:87,9,0     |
| 28066140 | 28066140 | G | T | intergenic | KLHL42,PTHRP | rs3911839  | 0.909145 | 0.881  | 1/1:0,3:3:9<br>:89,9,0    | 1/1:0,1:1:3:4<br>0,3,0    | /                         | 1/1:0,3:3:9<br>:89,9,0     |
| 28071851 | 28071851 | C | G | intergenic | KLHL42,PTHRP | rs7980330  | 0.89357  | 0.875  | 1/1:0,4:4:1<br>2:161,12,0 | /                         | 1/1:0,3:3:9<br>:117,9,0   | 1/1:0,2:2:6<br>:49,6,0     |
| 28071907 | 28071907 | G | A | intergenic | KLHL42,PTHRP | rs7980518  | 0.419329 | 0.4306 | 1/1:0,5:5:1<br>5:165,15,0 | 0/0:2,0:2:6:0,<br>6,71    | 1/1:0,5:5:1<br>5:170,15,0 | 0/0:6,0:6:1<br>8:0,18,172  |
| 28072126 | 28072126 | T | C | intergenic | KLHL42,PTHRP | rs7970077  | 0.89377  | 0.875  | /                         | 1/1:0,1:1:3:3<br>9,3,0    | 1/1:0,3:3:9<br>:89,9,0    | 1/1:0,1:1:3<br>:40,3,0     |
| 28092594 | 28092594 | C | T | intergenic | KLHL42,PTHRP | rs9651828  | 0.230431 | 0.1865 | 0/0:2,0:2:6<br>:0,6,73    | 1/1:0,2:2:6:7<br>8,6,0    | 0/0:1,0:1:3<br>:0,3,39    | /                          |
| 28092633 | 28092633 | T | C | intergenic | KLHL42,PTHRP | rs9651829  | 0.230431 | 0.1855 | 0/0:2,0:2:6<br>:0,6,76    | 1/1:0,2:2:6:6<br>4,6,0    | 0/0:1,0:1:3<br>:0,3,39    | /                          |

|          |          |   |   |            |              |            |          |        |                           |                             |                           |                         |
|----------|----------|---|---|------------|--------------|------------|----------|--------|---------------------------|-----------------------------|---------------------------|-------------------------|
| 28092791 | 28092791 | G | A | intergenic | KLHL42,PTHRP | rs9651800  | /        | /      | 1/1:0,2:2:6<br>:90,6,0    | /                           | /                         | /                       |
| 28093217 | 28093217 | T | C | intergenic | KLHL42,PTHRP | rs2347590  | 0.238019 | 0.1845 | /                         | 1/1:0,2:2:6:8<br>4,6,0      | /                         | 1/1:0,1:1:3<br>:43,3,0  |
| 28100899 | 28100899 | A | G | intergenic | KLHL42,PTHRP | rs3894107  | 0.345048 | 0.3155 | /                         | /                           | 1/1:0,3:3:9<br>:92,9,0    | /                       |
| 28104278 | 28104278 | A | C | intergenic | KLHL42,PTHRP | rs10431271 | 0.307109 | 0.3155 | 0/0:1,0:1:3<br>:0,3,40    | /                           | 0/1:2,4:6:3<br>1:114,0,31 | 1/1:0,2:2:6<br>:49,6,0  |
| 28117127 | 28117127 | C | G | intronic   | PTHRP        | rs40411    | 0.517772 | 0.5982 | /                         | /                           | 1/1:0,3:3:9<br>:87,9,0    | /                       |
| 28117213 | 28117213 | T | A | intronic   | PTHRP        | rs33087    | 0.437101 | 0.4415 | /                         | /                           | 1/1:0,3:3:9<br>:135,9,0   | /                       |
| 28117497 | 28117497 | T | A | intronic   | PTHRP        | rs33089    | 0.553315 | 0.5992 | 1/1:0,2:2:6<br>:78,6,0    | 1/1:0,2:2:6:4<br>2,6,0      | 1/1:0,3:3:9<br>:91,9,0    | /                       |
| 28122102 | 28122102 | C | G | intronic   | PTHRP        | rs26302    | 0.662141 | 0.7302 | 1/1:0,2:2:6<br>:84,6,0    | 1/1:0,5:5:15:<br>190,15,0   | 1/1:0,2:2:6<br>:80,6,0    | /                       |
| 28128075 | 28128075 | C | T | intergenic | PTHRP,CCDC91 | rs61915977 | 0.107628 | 0.1131 | 1/1:0,2:2:6<br>:83,6,0    | /                           | /                         | 0/0:1,0:1:3<br>:0,3,40  |
| 28128625 | 28128625 | T | C | intergenic | PTHRP,CCDC91 | rs12425376 | 0.469848 | 0.5784 | 0/1:2,7:9:5<br>1:186,0,51 | 0/0:10,0:10:2<br>9:0,29,303 | 0/1:3,1:4:2<br>9:29,0,77  | 1/1:0,1:1:3<br>:41,3,0  |
| 28140253 | 28140253 | T | G | intergenic | PTHRP,CCDC91 | rs1314085  | 0.907149 | 0.8254 | 1/1:0,1:1:3<br>:45,3,0    | 1/1:0,4:4:12:<br>180,12,0   | /                         | 0/0:3,0:3:9<br>:0,9,139 |
| 28140277 | 28140277 | C | T | intergenic | PTHRP,CCDC91 | rs1314084  | 0.750998 | 0.8254 | 1/1:0,1:1:3<br>:45,3,0    | 1/1:0,4:4:12:<br>180,12,0   | /                         | 0/0:2,0:2:6<br>:0,6,99  |

|          |          |   |   |            |              |            |          |        |                           |                         |                        |                           |
|----------|----------|---|---|------------|--------------|------------|----------|--------|---------------------------|-------------------------|------------------------|---------------------------|
| 28140675 | 28140675 | G | A | intergenic | PTHRP,CCDC91 | rs1267213  | 0.90595  | 0.8204 | 1/1:0,2:2:6<br>:78,6,0    | /                       | /                      | /                         |
| 28140714 | 28140714 | T | G | intergenic | PTHRP,CCDC91 | rs1267212  | 0.90615  | 0.8214 | 1/1:0,4:4:1<br>2:120,12,0 | 1/1:0,1:1:3:3<br>8,3,0  | /                      | 0/0:1,0:1:3<br>:0,3,38    |
| 28140829 | 28140829 | C | T | intergenic | PTHRP,CCDC91 | rs1267211  | 0.748802 | 0.8204 | 1/1:0,4:4:1<br>2:129,12,0 | 1/1:0,2:2:6:4<br>9,6,0  | 1/1:0,2:2:6<br>:49,6,0 | 0/1:2,2:4:3<br>7:37,0,37  |
| 28140918 | 28140918 | T | C | intergenic | PTHRP,CCDC91 | rs1267210  | 0.90595  | 0.8204 | 1/1:0,1:1:3<br>:40,3,0    | 1/1:0,2:2:6:8<br>2,6,0  | /                      | 0/1:2,1:3:3<br>1:31,0,61  |
| 28142950 | 28142950 | T | C | intergenic | PTHRP,CCDC91 | rs1267208  | 0.904353 | 0.8204 | 1/1:0,2:2:6<br>:83,6,0    | /                       | /                      | /                         |
| 28143462 | 28143462 | C | T | intergenic | PTHRP,CCDC91 | rs251955   | 0.905751 | 0.8204 | /                         | 1/1:0,2:2:6:4<br>7,6,0  | 1/1:0,1:1:3<br>:40,3,0 | 0/0:2,0:2:6<br>:0,6,49    |
| 28145950 | 28145950 | C | T | intergenic | PTHRP,CCDC91 | rs251952   | 0.905751 | 0.8204 | /                         | /                       | 1/1:0,3:3:9<br>:89,9,0 | /                         |
| 28148641 | 28148641 | A | G | intergenic | PTHRP,CCDC91 | rs805513   | 0.905751 | 0.8204 | 1/1:0,4:4:1<br>2:167,12,0 | /                       | 1/1:0,1:1:3<br>:43,3,0 | 0/0:2,0:2:6<br>:0,6,79    |
| 28173089 | 28173089 | T | C | intergenic | PTHRP,CCDC91 | rs7972767  | 0.832867 | 0.8681 | 1/1:0,2:2:6<br>:83,6,0    | 1/1:0,1:1:3:4<br>2,3,0  | /                      | /                         |
| 28186208 | 28186208 | T | C | intergenic | PTHRP,CCDC91 | rs10771400 | 0.000599 | /      | 0/1:5,2:7:6<br>9:69,0,251 | 0/0:3,0:3:9:0,<br>9,211 | 0/0:1,0:1:3<br>:0,3,83 | 0/0:4,0:4:1<br>2:0,12,198 |
| 28207017 | 28207017 | A | C | intergenic | PTHRP,CCDC91 | rs7970617  | /        | /      | 0/1:4,2:6:6<br>9:69,0,251 | 0/0:3,0:3:9:0,<br>9,211 | 0/0:1,0:1:3<br>:0,3,83 | 0/0:4,0:4:1<br>2:0,12,198 |
| 28208643 | 28208643 | T | G | intergenic | PTHRP,CCDC91 | rs35427724 | 0.413339 | 0.2629 | 1/1:0,2:2:6<br>:84,6,0    | 0/0:1,0:1:3:0,<br>3,37  | 0/0:1,0:1:3<br>:0,3,38 | 0/0:1,0:1:3<br>:0,3,38    |

|          |          |   |   |            |              |            |          |        |                           |                          |                         |                         |
|----------|----------|---|---|------------|--------------|------------|----------|--------|---------------------------|--------------------------|-------------------------|-------------------------|
| 28214089 | 28214089 | T | C | intergenic | PTHRP,CCDC91 | rs1554986  | 0.675319 | 0.8284 | 0/0:1,0:1:3<br>:0,3,42    | /                        | 1/1:0,3:3:9<br>:112,9,0 | 1/1:0,1:1:3<br>:38,3,0  |
| 28214138 | 28214138 | T | C | intergenic | PTHRP,CCDC91 | rs1554985  | 0.784345 | 0.9226 | /                         | /                        | /                       | 1/1:0,3:3:9<br>:104,9,0 |
| 28223555 | 28223555 | G | C | intergenic | PTHRP,CCDC91 | rs1600345  | 0.713658 | 0.9097 | 1/1:0,2:2:6<br>:78,6,0    | /                        | /                       | /                       |
| 28224911 | 28224911 | A | G | intergenic | PTHRP,CCDC91 | rs1842198  | 0.713658 | 0.9097 | 1/1:0,2:2:6<br>:80,6,0    | /                        | /                       | /                       |
| 28224912 | 28224912 | T | C | intergenic | PTHRP,CCDC91 | rs1842197  | 0.560104 | 0.6905 | /                         | 0/1:1,2:3:32:<br>75,0,32 | 1/1:0,1:1:3<br>:43,3,0  | 1/1:0,1:1:3<br>:43,3,0  |
| 28226654 | 28226654 | A | G | intergenic | PTHRP,CCDC91 | rs438277   | 0.72504  | 0.7113 | 1/1:0,2:2:6<br>:90,6,0    | /                        | /                       | /                       |
| 28229304 | 28229304 | T | G | intergenic | PTHRP,CCDC91 | rs533762   | 0.725639 | 0.7123 | 1/1:0,2:2:6<br>:90,6,0    | /                        | /                       | /                       |
| 28229358 | 28229358 | A | G | intergenic | PTHRP,CCDC91 | rs493401   | 0.725439 | 0.7153 | /                         | 0/1:1,3:4:28:<br>68,0,28 | /                       | /                       |
| 28262880 | 28262880 | C | T | intergenic | PTHRP,CCDC91 | rs2347595  | 0.636382 | 0.6915 | 0/1:1,1:2:3<br>:1:36,0,31 | /                        | 1/1:0,2:2:6<br>:49,6,0  | 1/1:0,2:2:6<br>:49,6,0  |
| 28271656 | 28271656 | C | T | intergenic | PTHRP,CCDC91 | rs899504   | 0.53095  | 0.6438 | /                         | 0/0:1,0:1:3:0,<br>3,33   | 1/1:0,2:2:6<br>:49,6,0  | 1/1:0,2:2:6<br>:49,6,0  |
| 28272574 | 28272574 | G | A | intergenic | PTHRP,CCDC91 | rs2881788  | 0.569289 | 0.6101 | 1/1:0,2:2:6<br>:77,6,0    | /                        | /                       | /                       |
| 28280928 | 28280928 | T | C | intergenic | PTHRP,CCDC91 | rs10219630 | 0.524361 | 0.6101 | 1/1:0,5:5:1<br>5:127,15,0 | /                        | /                       | 0/0:1,0:1:3<br>:0,3,43  |

|          |          |        |                 |            |              |             |          |        |                           |                             |                                 |                           |
|----------|----------|--------|-----------------|------------|--------------|-------------|----------|--------|---------------------------|-----------------------------|---------------------------------|---------------------------|
| 28283557 | 28283557 | C      | T               | intergenic | PTHRP,CCDC91 | rs4931726   | 0.52516  | 0.6131 | 1/1:0,1:1:3<br>:40,3,0    | 1/1:0,4:4:12:<br>150,12,0   | 0/0:2,0:2:6<br>:0,6,86          | 0/0:1,0:1:3<br>:0,3,43    |
| 28283780 | 28283780 | A      | G               | intergenic | PTHRP,CCDC91 | rs7310453   | 0.994209 | 1      | 1/1:0,2:2:6<br>:49,6,0    | 1/1:0,2:2:6:4<br>9,6,0      | 1/1:0,1:1:3<br>:43,3,0          | /                         |
| 28299837 | 28299837 | C      | T               | intergenic | PTHRP,CCDC91 | rs11049370  | 0.572883 | 0.6151 | 1/1:0,3:3:9<br>:89,9,0    | /                           | /                               | /                         |
| 28314076 | 28314076 | T      | C               | intergenic | PTHRP,CCDC91 | rs117785954 | 0.578075 | 0.6151 | 1/1:0,2:2:6<br>:73,6,0    | /                           | /                               | /                         |
| 28322217 | 28322217 | T      | C               | intergenic | PTHRP,CCDC91 | rs10843121  | 0.163938 | 0.0446 | 0/1:2,2:4:6<br>5:65,0,69  | 0/0:10,0:10:3<br>0:0,30,357 | 0/0:10,0:1<br>0:30:0,30,<br>310 | 0/0:9,0:9:2<br>7:0,27,259 |
| 28325997 | 28325997 | T      | C               | intergenic | PTHRP,CCDC91 | rs1842195   | 0.004393 | 0.0198 | 0/0:5,0:5:1<br>5:0,15,168 | 0/0:2,0:2:6:0,<br>6,78      | 0/1:1,5:6:2<br>3:123,0,23       | 0/0:1,0:1:3<br>:0,3,41    |
| 28336713 | 28336713 | C      | T               | intergenic | PTHRP,CCDC91 | rs61920228  | 0.557508 | 0.5823 | 1/1:0,2:2:6<br>:66,6,0    | /                           | 0/0:1,0:1:3<br>:0,3,38          | 0/0:1,0:1:3<br>:0,3,38    |
| 27957293 | 27957295 | TCT    | -               | intergenic | KLHL42,PTHRP | rs150733182 | 0.186701 | 0.2808 | 0/0:1,0:1:3<br>:0,3,49    | 0/0:2,0:2:6:0,<br>6,98      | 1/1:0,4:4:1<br>2:160,12,0       | 0/1:1,5:6:3<br>1:166,0,31 |
| 27963337 | 27963338 | AC     | inter-<br>genic |            | KLHL42,PTHRP | /           | /        | /      | 0/0:3,0:3:9<br>:0,9,133   | 0/0:2,0:2:6:0,<br>6,90      | 0/0:1,0:1:3<br>:0,3,45          | 0/1:2,2:4:7<br>1:71,0,78  |
| 27979758 | 27979763 | CCTTGA | -               | intergenic | KLHL42,PTHRP | rs147364420 | 0.961661 | 0.999  | 1/1:0,2:2:6<br>:90,6,0    | 1/1:0,3:3:9:1<br>35,9,0     | /                               | /                         |
| 28031280 | 28031280 | -      | ACACA<br>C      | intergenic | KLHL42,PTHRP | /           | /        | /      | /                         | 1/1:0,2:2:6:9<br>0,6,0      | /                               | /                         |
| 28050688 | 28050688 | C      | -               | intergenic | KLHL42,PTHRP | rs398019011 | 1        | 1      | 1/1:0,2:2:6<br>:75,6,0    | 1/1:0,1:1:3:3<br>7,3,0      | 1/1:0,2:2:6<br>:75,6,0          | /                         |

|           |          |        |            |            |              |             |          |        |                                   |                               |                                     |                                    |
|-----------|----------|--------|------------|------------|--------------|-------------|----------|--------|-----------------------------------|-------------------------------|-------------------------------------|------------------------------------|
| 28052501  | 28052501 | -      | TGTGT<br>G | intergenic | KLHL42,PTHRP | rs71438720  | /        | /      | /                                 | 1/1:0,2:2:6:9<br>0,6,0        | /                                   | /                                  |
| 28063329  | 28063329 | -      | T          | intergenic | KLHL42,PTHRP | rs397823807 | 1        | 1      | /                                 | 1/1:0,2:2:6:7<br>5,6,0        | 1/1:0,2:2:6<br>:75,6,0              | 1/1:0,2:2:6<br>:75,6,0             |
| 28072079  | 28072079 | -      | G          | intergenic | KLHL42,PTHRP | rs71039862  | 0.893371 | 0.875  | /                                 | 1/1:0,1:1:3:4<br>0,3,0        | 1/1:0,3:3:9<br>:121,9,0             | 1/1:0,1:1:3<br>:40,3,0             |
| 28108862  | 28108862 | G      | -          | intergenic | KLHL42,PTHRP | /           | /        | /      | /                                 | /                             | 1/1:0,2:2:6<br>:75,6,0              | /                                  |
| 28111319  | 28111319 | -      | A          | UTR3       | PTHRP        | rs34525777  | 0.597045 | 0.5427 | 1/1:0,17:1<br>7:51:425,5<br>1,0   | 0/1:4,5:9:69:<br>100,0,69     | 0/1:9,14:2<br>3:99:302,0<br>,143    | 0/0:11,0:11<br>:32:0,32,2<br>40    |
| 28115165  | 28115165 | -      | TAGA       | intronic   | PTHRP        | rs35742272  | 0.278954 | 0.2361 | 1/1:0,2:2:6<br>:90,6,0            | /                             | /                                   | /                                  |
| /28117192 | 28117192 | T      | -          | intronic   | PTHRP        | rs369112302 | /        | /      | /                                 | /                             | 1/1:0,3:3:9<br>:135,9,0             | /                                  |
| 28117199  | 28117201 | CTC    | -          | intronic   | PTHRP        | rs374738849 | /        | /      | /                                 | /                             | 1/1:0,3:3:9<br>:135,9,0             | /                                  |
| 28117405  | 28117406 | AG     | -          | intronic   | PTHRP        | rs10551155  | 0.750998 | 0.7331 | 1/1:0,2:2:6<br>:70,6,0            | 1/1:0,4:4:12:<br>136,12,0     | 1/1:0,2:2:6<br>:70,6,0              | /                                  |
| 28122657  | 28122662 | CACAGC | -          | UTR5       | PTHRP        | rs148094002 | 0.022165 | 0.0724 | 0/0:84,0:8<br>4:99:0,253<br>,5207 | 0/0:57,0:57:9<br>9:0,171,3834 | 0/0:112,0:<br>112:99:0,3<br>36,7227 | 0/1:33,18:<br>51:99:657,<br>0,2002 |
| 28140227  | 28140227 | A      | -          | intergenic | PTHRP,CCDC91 | rs34784016  | 0.907149 | 0.8254 | 1/1:0,1:1:3<br>:25,3,0            | 1/1:0,4:4:12:<br>101,12,0     | /                                   | 0/0:3,0:3:9<br>:0,9,84             |

|          |          |    |                                 |            |              |             |          |        |                                   |                              |                                  |                           |
|----------|----------|----|---------------------------------|------------|--------------|-------------|----------|--------|-----------------------------------|------------------------------|----------------------------------|---------------------------|
| 28143392 | 28143393 | AA | -                               | intergenic | PTHRP,CCDC91 | rs138562450 | 0.889776 | 0.8204 | /                                 | 1/1:0,3:3:9:1<br>01,9,0      | 1/1:0,1:1:3<br>:20,3,0           | 0/0:2:0:2:6<br>:0,6,39    |
| 28207974 | 28207974 | -  | TC                              | intergenic | PTHRP,CCDC91 | rs4035312   | 0.864816 | 0.9742 | /                                 | 1/1:0,5:5:15:<br>177,15,0    | 1/1:0,2:2:6<br>:72,6,0           | /                         |
| 28208636 | 28208637 | AT | -                               | intergenic | PTHRP,CCDC91 | rs139334326 | /        | /      | /                                 | /                            | /                                | 1/1:0,2:2:6<br>:79,6,0    |
| 28280980 | 28280980 | C  | -                               | intergenic | PTHRP,CCDC91 | rs58708720  | 1        | 1      | 1/1:0,2:2:6<br>:71,6,0            | 1/1:0,1:1:3:3<br>6,3,0       | 1/1:0,1:1:3<br>:36,3,0           | /                         |
| 28282587 | 28282587 | -  | AAG                             | intergenic | PTHRP,CCDC91 | rs10645250  | 0.577476 | 0.6141 | 1/1:0,1:1:3<br>:45,3,0            | 1/1:0,2:2:6:9<br>0,6,0       | /                                | /                         |
| 28336969 | 28336969 | -  | AAATG<br>CAAAA<br>AGAAA<br>TGAA | intergenic | PTHRP,CCDC91 | rs55823056  | /        | /      | 0/1:12,9:2<br>1:99:315,0<br>,1790 | 0/1:9,6:15:99<br>:218,0,1100 | 0/0:19,0:1<br>9:60:0,60,<br>2655 | 0/0:5,0:5:1<br>8:0,18,698 |

MYL3: myosin light chain 3; PTH1R: parathyroid hormone receptor 1; CCDC12: coiled-coil domain-containing protein 12; BTBD10: BTB/POZ domain-containing protein 10; PTH: parathyroid hormone; FAR1: fatty acyl-CoA reductase 1; KLHL42: kelch like family member 42; PTHRP: parathyroid hormone-related protein preproprotein; CCDC91: coiled-coil comain containing 91.

**Supplementary Table S3** Quality control and alignment analysis of WES data.

| Sample | Total reads | Average sequencing depth | Q20 % | Q30 % | Mapping rate on genome (%) | Coverage of exome (%) | Fraction of target covered $\geq 4x$ (%) | Fraction of target covered $\geq 20x$ (%) |
|--------|-------------|--------------------------|-------|-------|----------------------------|-----------------------|------------------------------------------|-------------------------------------------|
| IV-1   | 64389804    | 77.95                    | 97.01 | 92.1  | 99.86                      | 99.23%                | 99.04%                                   | 94.96%                                    |
| III-1  | 70417150    | 85.89                    | 96.68 | 91.43 | 99.82                      | 99.47%                | 99.31%                                   | 95.92%                                    |

**Supplementary Table S4.** Calling analysis of WES data.

| SNPs   | Exonic | Intronic | Missense | Indels | Frameshift<br>deletion | Frameshift<br>insertion | Stoploss | Stopgain |
|--------|--------|----------|----------|--------|------------------------|-------------------------|----------|----------|
| 287138 | 21959  | 140854   | 10140    | 55880  | 164                    | 143                     | 7        | 81       |

WES: Whole exome sequencing; SNP: single nucleotide polymorphism.

**Supplementary Table S5** Training genes for ToppGene analysis

|    | Entrez Gene ID | Gene Symbol | Gene name                                  |
|----|----------------|-------------|--------------------------------------------|
| 1  | 7043           | TGFB3       | transforming growth factor beta 3          |
| 2  | 7046           | TGFBR1      | transforming growth factor beta receptor 1 |
| 3  | 4487           | MSX1        | msh homeobox 1                             |
| 4  | 4488           | MSX2        | msh homeobox 2                             |
| 5  | 2248           | FGF3        | fibroblast growth factor 3                 |
| 6  | 7049           | TGFBR3      | transforming growth factor beta receptor 3 |
| 7  | 2249           | FGF4        | fibroblast growth factor 4                 |
| 8  | 650            | BMP2        | bone morphogenetic protein 2               |
| 9  | 652            | BMP4        | bone morphogenetic protein 4               |
| 10 | 2253           | FGF8        | fibroblast growth factor 8                 |
| 11 | 2254           | FGF9        | fibroblast growth factor 9                 |
| 12 | 3664           | IRF6        | interferon regulatory 6                    |

|    |       |        |                                                 |
|----|-------|--------|-------------------------------------------------|
| 13 | 1745  | DLX1   | distal-less homeobox 1                          |
| 14 | 1746  | DLX2   | distal-less homeobox 2                          |
| 15 | 23314 | SATB2  | SATB homeobox 2                                 |
| 16 | 2260  | FGFR1  | fibroblast growth factor receptor 1             |
| 17 | 8085  | KMT2D  | lysine methyltransferase 2D                     |
| 18 | 5083  | PAX9   | paired box 9                                    |
| 19 | 84634 | KISS1R | KISS1 receptor                                  |
| 20 | 860   | RUNX2  | RUNX family transcription factor 2              |
| 21 | 5727  | PTCH1  | patched 1                                       |
| 22 | 54880 | BCOR   | BCL6 corepressor                                |
| 23 | 8481  | OFD1   | OFD1 centriole and centriolar satellite protein |
| 24 | 26468 | LHX6   | LIM homeobox 6                                  |
| 25 | 999   | CDH1   | cadherin 1                                      |
| 26 | 3688  | ITGB1  | integrin subunit beta 1                         |
| 27 | 7403  | KDM6A  | lysine demethylase 6A                           |

|    |        |         |                                                          |
|----|--------|---------|----------------------------------------------------------|
| 28 | 1005   | CDH7    | cadherin 7                                               |
| 29 | 7473   | WNT3    | Wnt family member 3                                      |
| 30 | 8626   | TP63    | tumor protein p63                                        |
| 31 | 7474   | WNT5A   | Wnt family member 5A                                     |
| 32 | 8313   | AXIN2   | axin 2                                                   |
| 33 | 5818   | NECTIN1 | nectin cell adhesion molecule 1                          |
| 34 | 7291   | TWIST1  | twist family bHLH transcription factor 1                 |
| 35 | 5308   | PITX2   | paired like homeodomain 2                                |
| 36 | 7039   | TGFA    | transforming growth factor alpha                         |
| 37 | 9608   | PTH1R   | parathyroid hormone 1 receptor                           |
| 38 | 13726  | KMT2C   | lysine methyltransferase 2D                              |
| 39 | 1277   | COL1A1  | collagen type I alpha 1                                  |
| 40 | 256764 | WDR72   | WD repeat domain 72                                      |
| 41 | 4054   | LTBP3   | latent transforming growth factor beta binding protein 3 |
| 42 | 54757  | FAM20A  | FAM20A golgi associated secretory pathway pseudokinase   |

---

**Supplementary Table S6** Test results for ToppGene analysis

| Rank | Gene Symbol | Gene ID | Average score | Overall <i>P</i> value |
|------|-------------|---------|---------------|------------------------|
| 1    | TMEM119     | 338773  | 0.591441      | 0.006652               |
| 2    | PCSK4       | 54760   | 0.474962      | 0.020284               |
| 3    | FAM83G      | 644815  | 0.298837      | 0.094564               |

The overall *P* value < 0.01 was taken to represent a significant difference.

Tmem119: transmembrane protein 119; PCSK4: proprotein convertase subtilisin/kexin type 4; FAM83G: family with sequence similarity 83 member G.

**Supplementary Table S7** Primer pairs used in RT-qPCR analysis

| Gene           | Sense primer (5'-3')      | Antisense primer (5'-3') |
|----------------|---------------------------|--------------------------|
| <i>Tmem119</i> | ATCACGTACTGGCGGAAGAA      | GAGTTCCGCCATGACTTCTCT    |
| <i>Runx2</i>   | AGGTCGGTGTGAACGGATTTG     | TGTAGACCATGTAGTTGAGGTCA  |
| <i>Ocn</i>     | TACACGTGCAGGTCAATCCC      | GTTTGGCTTTAGGGCAGCAC     |
| <i>Osx</i>     | TGCTATACTCTGGGGGCTCT      | ACAAAGCTCAGGGGGAATCG     |
| <i>Bsp2</i>    | CAGGGAGGCAGTGACTCTTC      | AGTGTGGAAAGTGTGGAGTT     |
| <i>Col1a1</i>  | ATGCCGCGACCTCAAGATG       | TGAGGCACAGACGGCTGAGTA    |
| <i>Alp</i>     | CCAACTCTTTTGTGCCAGAGA     | GGCTACATTGGTGTTGAGCTTTT  |
| <i>Atf4</i>    | TGCCAGATGAGCTCTTGACC      | TCATAAGGTTTGGGCCGAGG     |
| <i>Glut1</i>   | GTAAGCGTTGTCCAGGGTGA      | TGCATTGCCCATGATGGAGT     |
| <i>G6pd</i>    | TGGAGGAGTTCTTTGCCCGTAATTC | GTGGCTGTGAGGTGCTTATAGGAG |
| <i>Ldha</i>    | GCTCCCCAGAACAAGATTACAG    | TCGCCCTTGAGTTTGTCTTC     |
| <i>Pkm2</i>    | TCGCCCTTGAGTTTGTCTTC      | GTAAGCGTTGTCCAGGGTGA     |

|                |                        |                         |
|----------------|------------------------|-------------------------|
| <i>Hk1</i>     | CGAGCTGAAGGATGACCAAGT  | TGATCAGGCCGACTTCACAC    |
| <i>Pgk1</i>    | GAGCCTCACTGTCCAAACTAGG | TCTGCTTAGCTCGACCCACA    |
| <i>Gapdh</i>   | AGGTCGGTGTGAACGGATTTG  | TGTAGACCATGTAGTTGAGGTCA |
| <i>β-Actin</i> | GTTGGAGCAAACATCCCCCA   | CGCGACCATCCTCCTCTTAG    |

Tmem119: transmembrane protein 119; Runx2: RUNX family transcription factor 2; Osx: Osterix; Ocn: osteocalcin; Bsp2: bone sialoprotein II; Col1α1: collagen type I alpha 1 chain; Alp: alkaline phosphatase; Atf4: activating transcription factor 4; Glut1: glucose transporter type 1; G6pd: glucose-6-phosphate dehydrogenase; Ldha: lactate dehydrogenase A; Pkm2: pyruvate Kinase M2; Hk1: hexokinase 1; Pgk1: phosphoglycerate kinase 1; Gapdh: glyceraldehyde-3-phosphate dehydrogenase; β-Actin: actin beta.

## FIGURES

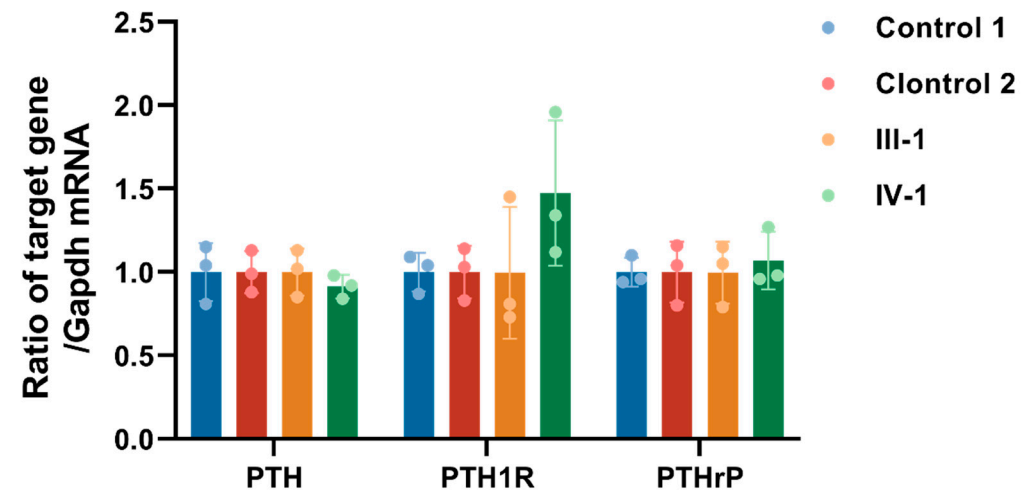

**Supplementary Figure S1** The expression level of PTH, PTH1R and PTHrP gene was similar among family members. PTH: parathyroid hormone; PTH1R: Parathyroid hormone/parathyroid hormone-related peptide receptor; PTHrP: parathyroid hormone-related peptide.

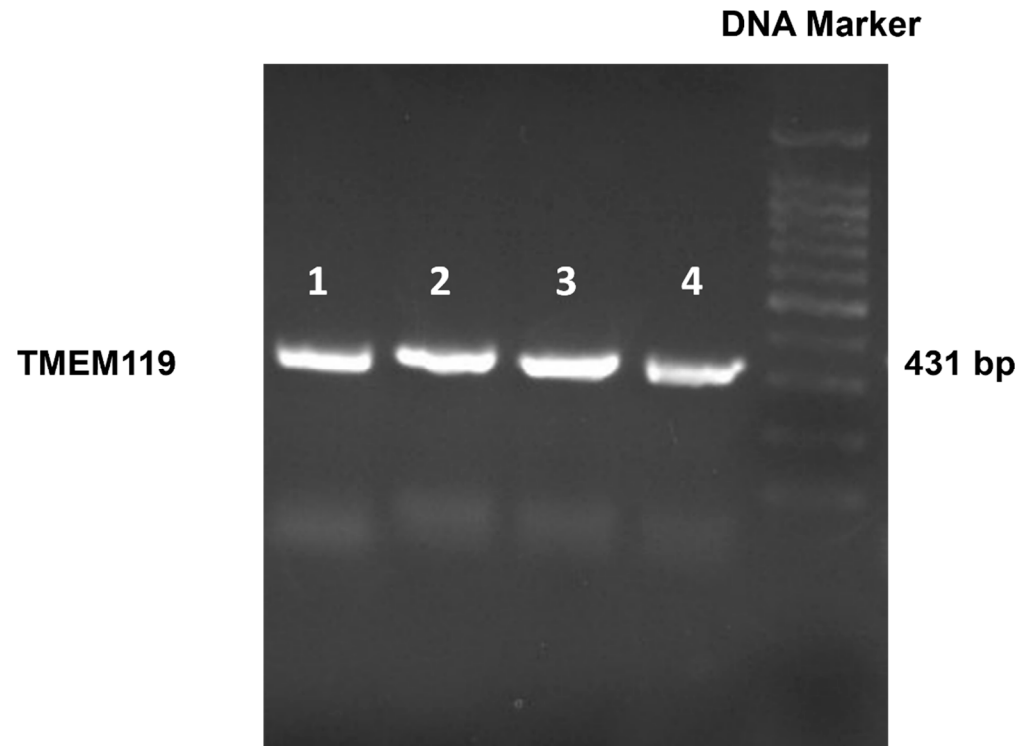

**Supplementary Figure S2** PCR products were evaluated by agarose gel electrophoresis. The DNA molecules in all four samples were the same 431 bp. PCR: polymerase chain reaction; bp: base pair; TMEM119: transmembrane protein 119; bp: base pair.

Lane 1: control 1

Lane 2: control 2

Lane 3: III-1

Lane 4: IV-1

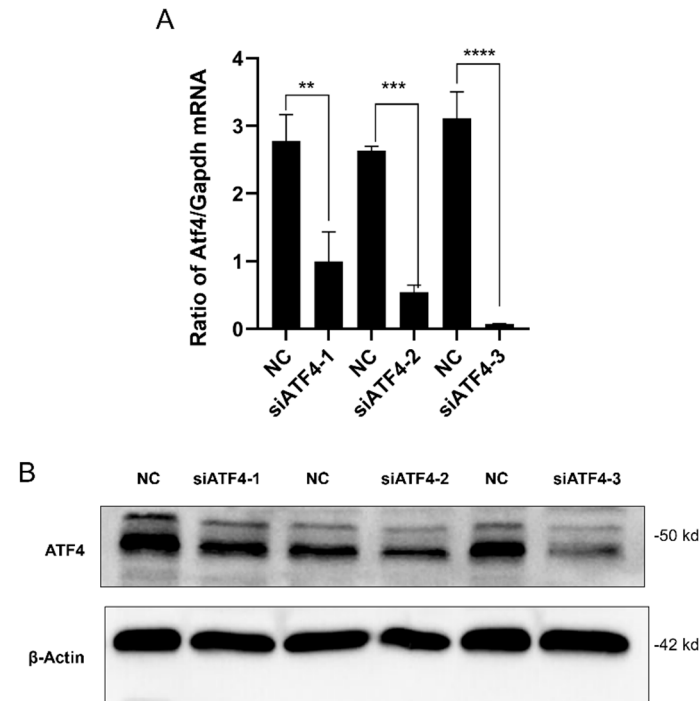

**Supplementary Figure S3** Validation of the effect of ATF4 gene knockdown. **(A)** The mRNA level of ATF4 was knocked down at 48 h after siRNA transfection. **(B)** The protein level of ATF4 was knocked down at 48 h after siRNA transfection. ATF4: activating transcription factor 4; siNC: small interfering RNA-negative control; WT: wild-type; EV: empty vector. *P* values were significant at \*\**p* < 0.01

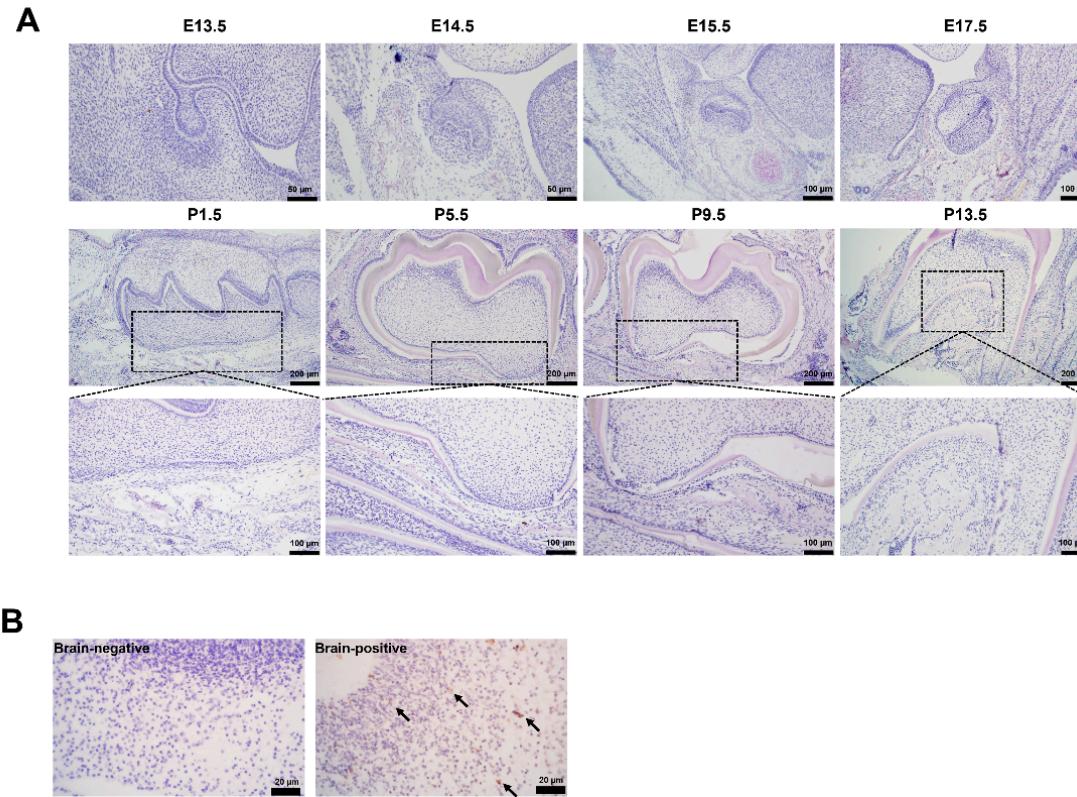

**Supplementary Figure S4** Positive and negative control of Immunohistochemical staining. **(A)** Negative control of immunohistochemical staining of mice tooth germs at different developmental stages. **(B)** Negative and positive control of immunohistochemical staining of mouse brain tissue. Microglia with Tmem119-positive staining (black arrows). P: postnatal; E: embryo.
